# Supplementary material for: Chinese Sumac (Rhus chinensis Mill.) Fruits Prevent Hyperuricemia and Uric Acid Nephropathy in Mice Fed a High-Purine Yeast Diet
Source: MDPI journal article supplement (doi:10.3390/nu16020184), 2024-01-05

# SUPPORTING INFORMATION

## **Chinese Sumac (*Rhus chinensis* Mill.) Fruits Prevent Hyperuricemia and Uric Acid Nephropathy in Mice Fed a High-Purine Yeast Diet**

Nan Ma, Shengbao Cai, Yilin Sun, Chuanqi Chu\*

Faculty of Food Science and Engineering, Kunming University of Science and Technology, Kunming, People's Republic of China, 650500.

\* Correspondence: [chuanqichu@aliyun.com](mailto:chuanqichu@aliyun.com)

## **Characterization of the major bioactive compounds in the ethanol extract of Chinese sumac fruits**

The major bioactive compounds in the ethanol extract of Chinese sumac fruits were firstly separated by using a Thermo Fisher Ultimate 3000 UHPLC System (Thermo Fisher Scientific, Germany) with an Agilent Zorbax SB-C18 column (1.7  $\mu\text{m}$ , 2.1 mm  $\times$  100 mm), and then characterized by a Q-Exactive Orbitrap mass spectrometer (Thermo Fisher Scientific, Bremen, Germany) in the negative mode. The HPLC parameters were as follows: mobile phases, 0.1% formic acid in water (A) and acetonitrile (B); flow rate, 0.1 mL/min; elution procedure, 0–2min, 5% B; 2–8 min, 5%–30% B; 8–12 min, 30%–50% B; 12–15min, 50%; 15–18 min, 50%–5%; 18–20 min, 5%; column temperature, 30°C; volume of sample injection, 2.0  $\mu\text{L}$ . Mass parameters were set as follows: full MS scan range, 50–1000 m/z; auxiliary gas flow, 9 L/min; sheath gas flow rate, 33 L/min; sweep gas, 4 L/min; S-lens RF level, 50%; spray voltage, 3.3 kV, capillary temperature, 330 °C; heater temperature, 360 °C.

**Fig. S1** Chromatogram of ethanol extract from Chinese sumac fruits. Peak identification and their MS data are shown in Table S1.

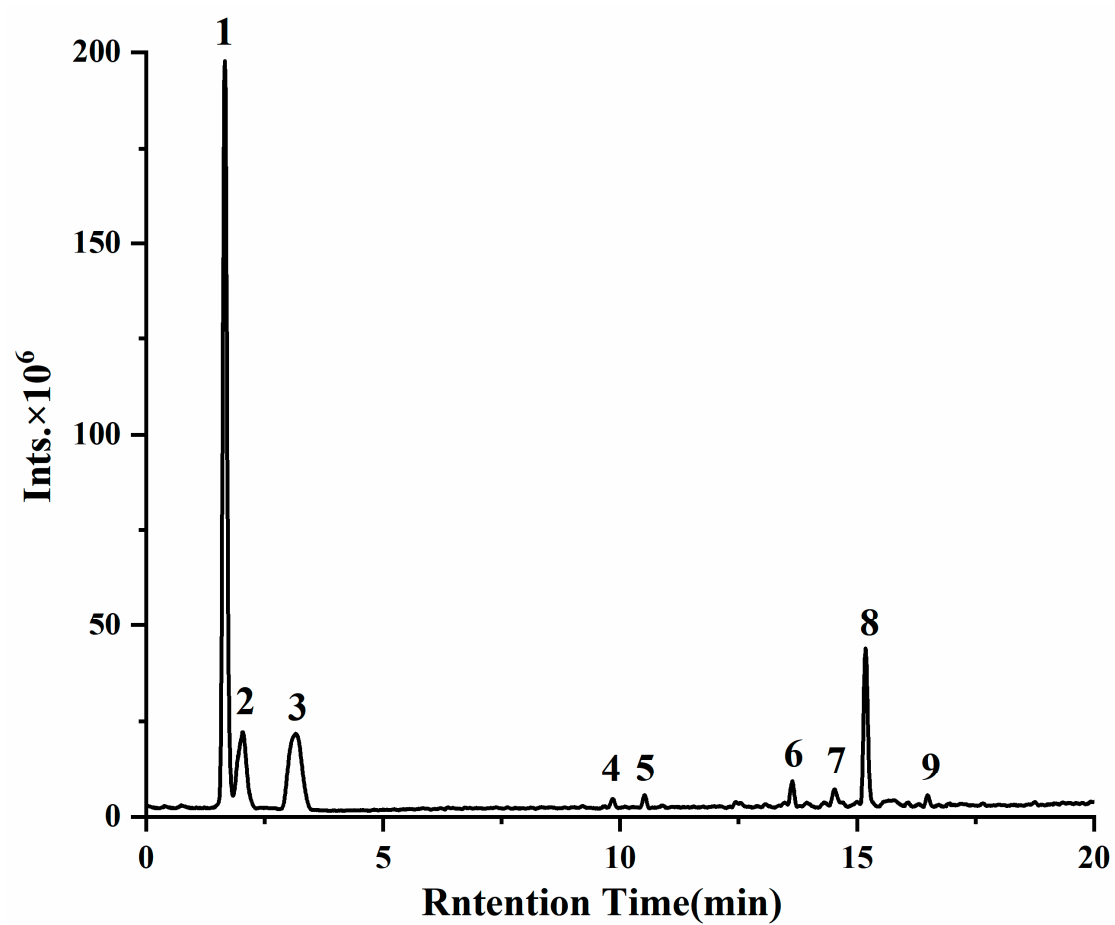

**Table S1** Phytochemical identification of the ethanol extract from Chinese sumac fruits by UHPLC-ESI-HRMS/MS

| Peak No. | Compounds                         | RT (min) | Molecular formula                               | [M-H] <sup>-</sup> (m/z) | MS/MS ion fragments           | mg/g of dry extract | Average percentage (%; Total identified phenolic content) |
|----------|-----------------------------------|----------|-------------------------------------------------|--------------------------|-------------------------------|---------------------|-----------------------------------------------------------|
| 1        | Malic acid                        | 1.66     | C <sub>4</sub> H <sub>6</sub> O <sub>5</sub>    | 133.0130                 | 71.0123(100),72.9917(27.45)   | ---                 | ---                                                       |
| 2        | Citric acid                       | 2.04     | C <sub>6</sub> H <sub>8</sub> O <sub>7</sub>    | 191.0188                 | 57.0332(85.56),67.0175(42.45) | ---                 | ---                                                       |
| 3        | Gallic acid                       | 3.16     | C <sub>7</sub> H <sub>6</sub> O <sub>5</sub>    | 169.0132                 | 69.0331(100),124.0153(91.18)  | 38.21±0.34          | 47.54                                                     |
| 4        | Protocatechuic acid               | 6.78     | C <sub>7</sub> H <sub>6</sub> O <sub>4</sub>    | 153.0182                 | 108.0203(100),78.9576(91.18)  | 4.90±0.16           | 6.09                                                      |
| 5        | Digallic acid                     | 9.84     | C <sub>14</sub> H <sub>10</sub> O <sub>9</sub>  | 321.0250                 | 125.0231(100),169.0131(25.58) | 4.07±0.10           | 5.06                                                      |
| 6        | Trigalloyl glucose                | 10.51    | C <sub>27</sub> H <sub>24</sub> O <sub>18</sub> | 635.0889                 | 169.0132(100),483.0791(17.62) | 4.91±0.14           | 6.11                                                      |
| 7        | Myricetin-3- <i>O</i> -rhamnoside | 13.63    | C <sub>21</sub> H <sub>20</sub> O <sub>12</sub> | 463.0881                 | 316.0221(100),317.0273(30.24) | 7.87±0.18           | 9.80                                                      |
| 8        | Quercetin-3- <i>O</i> -rhamnoside | 15.18    | C <sub>21</sub> H <sub>20</sub> O <sub>11</sub> | 447.0929                 | 300.0272(100),301.0339(59.23) | 18.28±0.28          | 22.75                                                     |
| 9        | Kaempferol-3- <i>O</i> -hexoside  | 16.49    | C <sub>21</sub> H <sub>20</sub> O <sub>10</sub> | 431.0981                 | 284.0324(100),285.0395(84.51) | 2.13±0.20           | 2.65                                                      |

RT: retention time; Values are expressed as the mean ± S.D. ( $n = 3$ , µg/g of dry extract); Gallic acid standard was used for quantifying the compounds 3,5;6; protocatechuic acid standard was used for quantifying the compound 4; myricetin-3-*O*-rhamnoside standard was used for quantifying the compounds 7; quercetin-3-*O*-rhamnoside standard was used for quantifying the compounds 8; kaempferol standard was used for quantifying the compounds 9.

Raw images of western blot in Figure 5

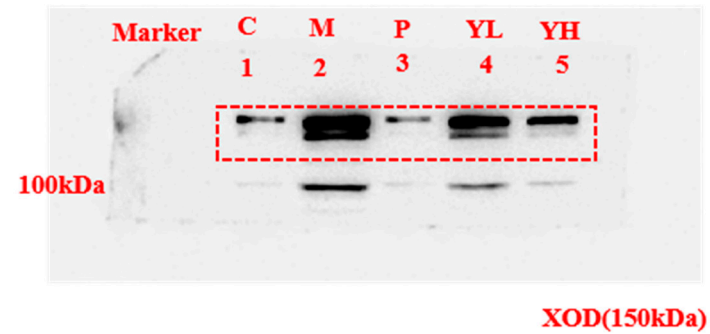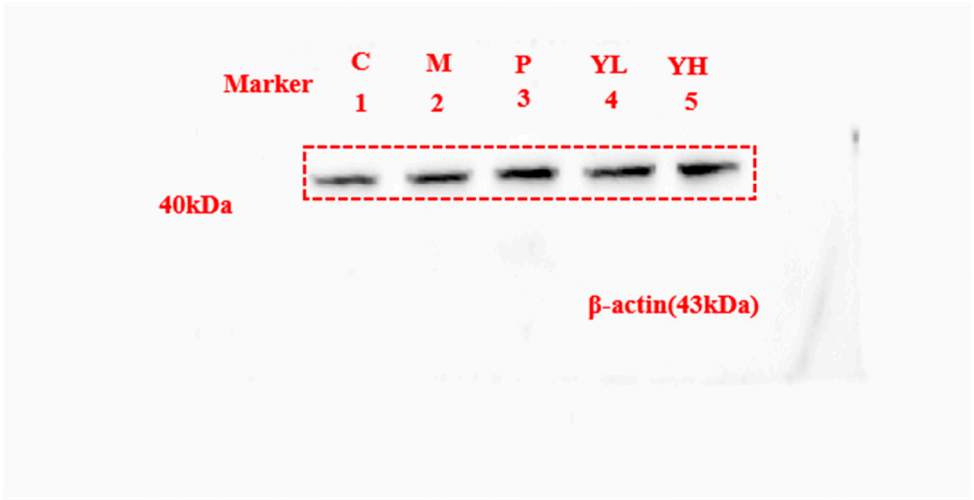

Raw images of western blot in Figure 6

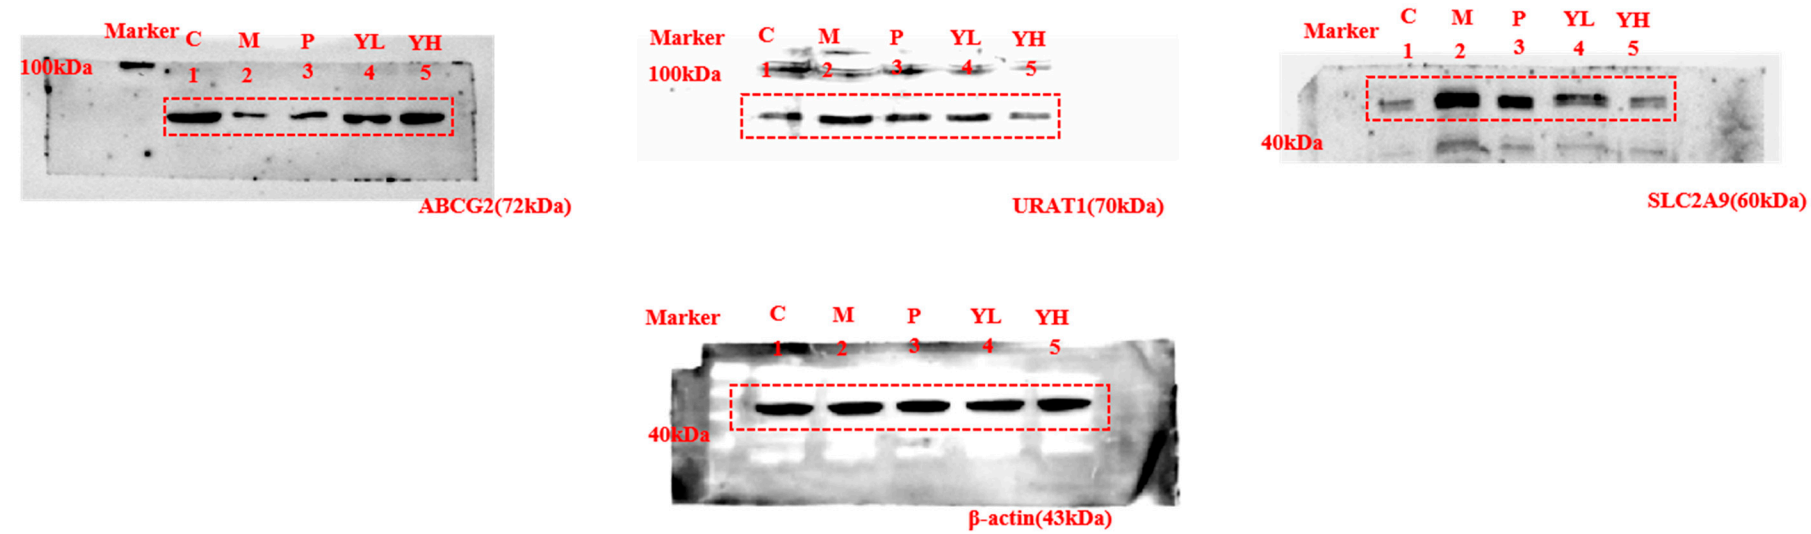

Raw images of western blot in Figure 8

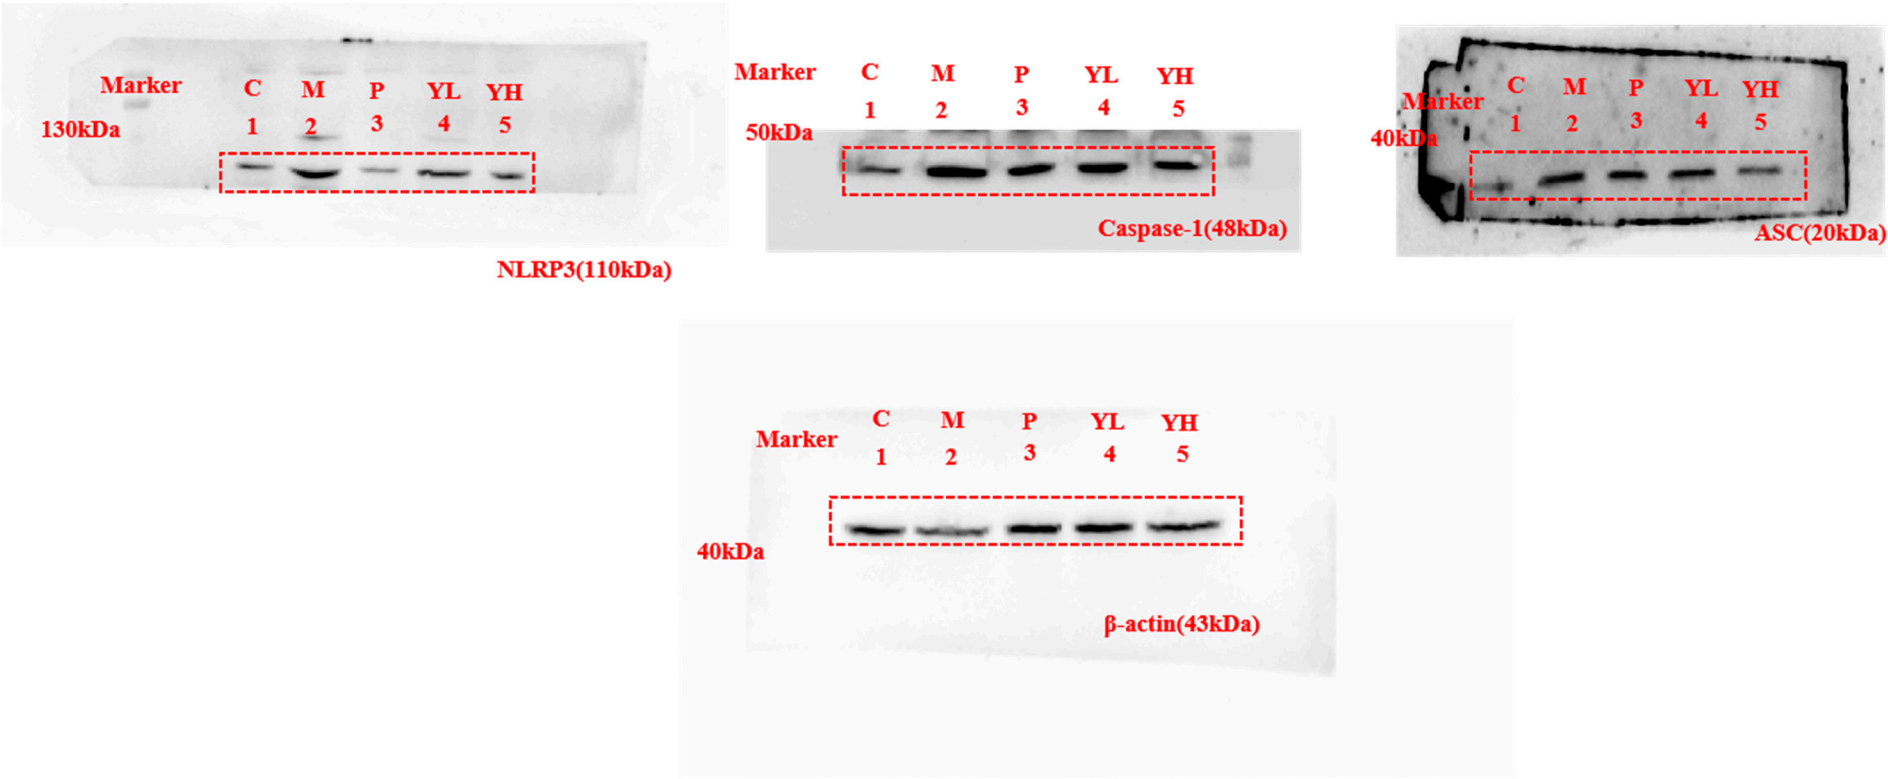

Supplement: s1 [file s1]
